# Supplementary material
Source: Springer Nature journal article supplement (https://www.springermedizin.de/resource/supplementary/13063_2011_627_MOESM1_ESM.pdf/9618896)

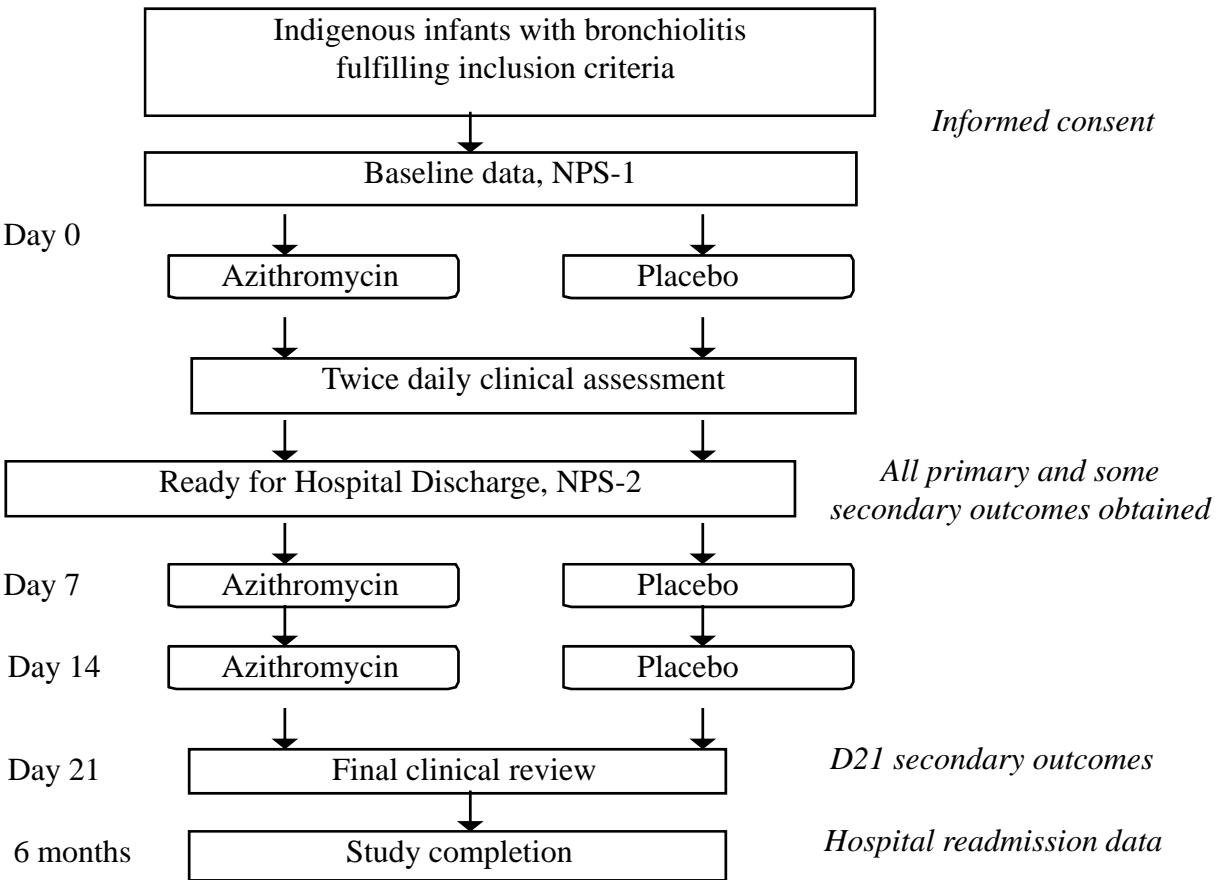

Standardised management of bronchiolitis other than trial medications

Supplement: MOESM1 [file 9618896]
